# Supplementary material for: Reliability of the standard goniometry and diagrammatic recording of finger joint angles: a comparative study with healthy subjects and non-professional raters
Source: Springer Nature journal article supplement (doi:10.1186/1471-2474-14-17), 2013-01-09
Supplement: 12891_2012_1589_MOESM2_ESM.pdf [file 12891_2012_1589_MOESM2_ESM.pdf]

## DATA COLLECTION DESIGN

### STUDY PARTS I - A & II - A

| Subject<br>(Try-angle set) | Characteristic of Individual Try-angles<br>(Standard angles <sup>a</sup> by Joint - Position - Subposition) | Raters' measurements <sup>b</sup> |    |     |    |          |    |     |    |  |  |  |  |  |
|----------------------------|-------------------------------------------------------------------------------------------------------------|-----------------------------------|----|-----|----|----------|----|-----|----|--|--|--|--|--|
|                            |                                                                                                             | Rater 1                           |    |     |    | Rater 10 |    |     |    |  |  |  |  |  |
|                            |                                                                                                             | PGn <sup>c</sup>                  |    | SGn |    | PGn      |    | SGn |    |  |  |  |  |  |
|                            |                                                                                                             | T1                                | T2 | T1  | T2 | T1       | T2 | T1  | T2 |  |  |  |  |  |
| Subject 1                  | MCP - FLEX - 1                                                                                              | d                                 |    |     |    |          |    |     |    |  |  |  |  |  |
|                            | PIP - FLEX - 1                                                                                              |                                   |    |     |    |          |    |     |    |  |  |  |  |  |
|                            | DIP - FLEX - 1                                                                                              |                                   |    |     |    |          |    |     |    |  |  |  |  |  |
|                            | MCP - EXT - 1                                                                                               |                                   |    |     |    |          |    |     |    |  |  |  |  |  |
|                            | PIP - EXT - 1                                                                                               |                                   |    |     |    |          |    |     |    |  |  |  |  |  |
|                            | DIP - EXT - 1                                                                                               |                                   |    |     |    |          |    |     |    |  |  |  |  |  |
| .                          | .                                                                                                           |                                   |    |     |    |          |    |     |    |  |  |  |  |  |
|                            | .                                                                                                           |                                   |    |     |    |          |    |     |    |  |  |  |  |  |
|                            | .                                                                                                           |                                   |    |     |    |          |    |     |    |  |  |  |  |  |
| Subject 12                 | MCP - FLEX - 12                                                                                             |                                   |    |     |    |          |    |     |    |  |  |  |  |  |
|                            | PIP - FLEX - 12                                                                                             |                                   |    |     |    |          |    |     |    |  |  |  |  |  |
|                            | DIP - FLEX - 12                                                                                             |                                   |    |     |    |          |    |     |    |  |  |  |  |  |
|                            | MCP - EXT - 12                                                                                              |                                   |    |     |    |          |    |     |    |  |  |  |  |  |
|                            | PIP - EXT - 12                                                                                              |                                   |    |     |    |          |    |     |    |  |  |  |  |  |
|                            | DIP - EXT - 12                                                                                              |                                   |    |     |    |          |    |     |    |  |  |  |  |  |

### STUDY PARTS I - B & II - B

| Rater<br>(Try-angle set) | Characteristic of Shared Try-angles<br>(Standard angles <sup>a</sup> by Joint - Position - Rater's # - Subposition) | Raters' measurements <sup>b</sup> |    |     |            |    |     |  |  |  |  |  |  |
|--------------------------|---------------------------------------------------------------------------------------------------------------------|-----------------------------------|----|-----|------------|----|-----|--|--|--|--|--|--|
|                          |                                                                                                                     | Subject 1                         |    |     | Subject 12 |    |     |  |  |  |  |  |  |
|                          |                                                                                                                     | PGn <sup>c</sup>                  |    | SGn | PGn        |    | SGn |  |  |  |  |  |  |
|                          |                                                                                                                     | T1                                | T2 | T1  | T2         | T1 | T2  |  |  |  |  |  |  |
| Rater 11                 | PIP - EXT - 11 - 1                                                                                                  | d                                 |    |     |            |    |     |  |  |  |  |  |  |
|                          | PIP - FLEX - 11 - 1                                                                                                 |                                   |    |     |            |    |     |  |  |  |  |  |  |
|                          | PIP - EXT - 11 - 2                                                                                                  |                                   |    |     |            |    |     |  |  |  |  |  |  |
|                          | PIP - FLEX - 11 - 2                                                                                                 |                                   |    |     |            |    |     |  |  |  |  |  |  |
|                          | PIP - EXT - 11 - 3                                                                                                  |                                   |    |     |            |    |     |  |  |  |  |  |  |
|                          | PIP - FLEX - 11 - 3                                                                                                 |                                   |    |     |            |    |     |  |  |  |  |  |  |
|                          | PIP - EXT - 11 - 4                                                                                                  |                                   |    |     |            |    |     |  |  |  |  |  |  |
|                          | PIP - FLEX - 11 - 4                                                                                                 |                                   |    |     |            |    |     |  |  |  |  |  |  |
|                          | PIP - EXT - 11 - 5                                                                                                  |                                   |    |     |            |    |     |  |  |  |  |  |  |
|                          | PIP - FLEX - 11 - 5                                                                                                 |                                   |    |     |            |    |     |  |  |  |  |  |  |
|                          | PIP - EXT - 11 - 6                                                                                                  |                                   |    |     |            |    |     |  |  |  |  |  |  |
|                          | PIP - FLEX - 11 - 6                                                                                                 |                                   |    |     |            |    |     |  |  |  |  |  |  |
| Rater 12                 | PIP - EXT - 12 - 1                                                                                                  |                                   |    |     |            |    |     |  |  |  |  |  |  |
|                          | PIP - FLEX - 12 - 1                                                                                                 |                                   |    |     |            |    |     |  |  |  |  |  |  |
|                          | PIP - EXT - 12 - 2                                                                                                  |                                   |    |     |            |    |     |  |  |  |  |  |  |
|                          | PIP - FLEX - 12 - 2                                                                                                 |                                   |    |     |            |    |     |  |  |  |  |  |  |
|                          | PIP - EXT - 12 - 3                                                                                                  |                                   |    |     |            |    |     |  |  |  |  |  |  |
|                          | PIP - FLEX - 12 - 3                                                                                                 |                                   |    |     |            |    |     |  |  |  |  |  |  |
|                          | PIP - EXT - 12 - 4                                                                                                  |                                   |    |     |            |    |     |  |  |  |  |  |  |
|                          | PIP - FLEX - 12 - 4                                                                                                 |                                   |    |     |            |    |     |  |  |  |  |  |  |
|                          | PIP - EXT - 12 - 5                                                                                                  |                                   |    |     |            |    |     |  |  |  |  |  |  |
|                          | PIP - FLEX - 12 - 5                                                                                                 |                                   |    |     |            |    |     |  |  |  |  |  |  |
|                          | PIP - EXT - 12 - 6                                                                                                  |                                   |    |     |            |    |     |  |  |  |  |  |  |
|                          | PIP - FLEX - 12 - 6                                                                                                 |                                   |    |     |            |    |     |  |  |  |  |  |  |

I & II = replicate study stages; SGn = standard finger goniometer; PGn = paper strip goniometer; T = trial; MCP, PIP, and DIP = metacarpophalangeal, proximal interphalangeal, and distal interphalangeal joints, respectively; FLEX, EXT = positions of imitated flexion and extension, respectively; # = number.

<sup>a</sup> more details, including values of the standard angles, are presented in Additional file 3;

<sup>b</sup> observed angles of the joints positioned by the appropriate try-angles; <sup>c</sup> angle values were obtained after computerized measurements of diagrams; <sup>d</sup> empty cells for appropriate angles in degrees.

**Note** = the raters of the study stage I became subjects of the study stage II; and the subjects of the study stage I became raters of the study stage II.
