# Supplementary material for: Reliability of the standard goniometry and diagrammatic recording of finger joint angles: a comparative study with healthy subjects and non-professional raters
Source: BMC Musculoskelet Disord. 2013 Jan 9;14:17. doi: 10.1186/1471-2474-14-17 (PMC3557198; doi:10.1186/1471-2474-14-17)
Supplement: Additional file 6 — Scheme of obtaining significant standard differences in the study parts B. [file 1471-2474-14-17-S6.pdf]

**A, B, and C =  
STANDARD ANGLES  
(OF TRY-ANGLES)  
 $A < B < C$**

**A, a = BASELINE ANGLES**

**a, b, and c =**

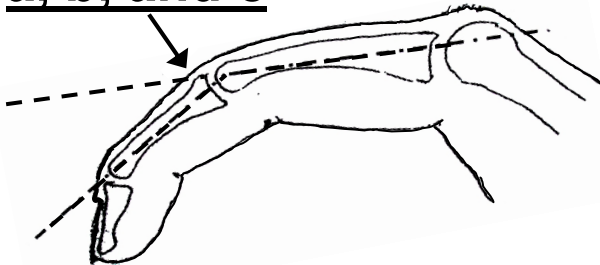

**OBSERVED ANGLES OF  
PIP JOINTS (POSITIONED  
BY DORSAL APPLICATION  
OF TRY-ANGLE GUIDES)**

**(n) = SUBJECT NUMBER**

**A**

**B**

**C**

**TRY-ANGLE  
GUIDE**

**A - B**

**A - C**

**(A - B), (A - C) =  
STANDARD  
DIFFERENCES**

**a vs c**

**a vs b**

**vs = COMPARED  
BY WILCOXON  
TEST**

**a(1),  
... ,  
a(n)**

**b(1),  
... ,  
b(n)**

**c(1),  
... ,  
c(n)**

**IF (a vs b) IS SIGNIFICANT, THEN (A - B)  
IS THE LOWEST SIGNIFICANT STANDARD DIFFERENCE**
