# Supplementary material for: Reliability of the standard goniometry and diagrammatic recording of finger joint angles: a comparative study with healthy subjects and non-professional raters
Source: BMC Musculoskelet Disord. 2013 Jan 9;14:17. doi: 10.1186/1471-2474-14-17 (PMC3557198; doi:10.1186/1471-2474-14-17)
Supplement: Additional file 7 — Raw data of the study. This additional file contains the following worksheets. Data IA,IIA. This worksheet includes a condensed version of raw data of the study parts A, appropriate measurement differences, and their dichotomized scores; Data I-B, II-B. This worksheet includes a condensed version of raw data of the study parts B. [file 1471-2474-14-17-S7.xls]

## Sheet:  Data IA,IIA
V.Macionis. Reliability of the standard goniometry and diagrammatic recording of finger joint angles: a comparative study with healthy subjects and non-professional raters. Additional file 7.
NOTES: Rater Z-8 in the study part II-A did not evaluate MCP extension and DIP flexion with standard goniometer in Trial 2.																Cell color with missing values								ID = identification; Flx=flexion; Ext = extension; P = paper goniometer; G = standard goniometer; T1 = trial 1; T2 = trial 2; ABS = absolute value; MCP = metacarpophalangeal joint; PIP = proximal interphalangeal joint; DIP = distal interphalangeal joint.
			Observed joint angle						Observed joint angle						Observed joint angle						Observed joint angle											Differences				Differences				Differences				Differences				Differences
Rater ID	Subject ID		MCP Flx P T1	MCP Flx G T1	MCP Flx P T2	MCP Flx G T2	MCP Ext P T1	MCP Ext G T1	MCP Ext P T2	MCP Ext G T2	PIP Flx P T1	PIP Flx G T1	PIP Flx P T2	PIP Flx G T2	PIP Ext P T1	PIP Ext G T1	PIP Ext P T2	PIP Ext G T2	DIP Flx P T1	DIP Flx G T1	DIP Flx P T2	DIP Flx G T2	DIP Ext P T1	DIP Ext G T1	DIP Ext P T2	DIP Ext G T2			MCP Flx P (T1-T2)	MCP Ext P (T1-T2)	PIP Flx P (T1-T2)	PIP Ext P (T1-T2)	DIP Flx P (T1-T2)	DIP Ext P (T1-T2)		MCP Flx G (T1-T2)	MCP Ext G (T1-T2)	PIP Flx G (T1-T2)	PIP Ext G (T1-T2)	DIP Flx G (T1-T2)	DIP Ext G (T1-T2)		MCP Flx P T1 - G T1	MCP Ext P T1 - G T1	PIP Flx P T1 - G T1	PIP Ext P T1 - G T1	DIP Flx P T1 - G T1	DIP Ext P T1 - G T1
W-1	Z-1		46	42	46	41	2	12	4	9	75	70	72	70	34	32	71	70	59	61	64	64	21	12	21	18			0	-2	3	-37	-5	0		1	3	0	-38	-3	-6		4	-10	5	2	-2	9
W-1	Z-2		56	55	53	52	8	6	5	9	83	77	82	79	27	25	23	25	58	58	62	64	24	27	29	26			3	3	1	4	-4	-5		3	-3	-2	0	-6	1		1	2	6	2	0	-3
W-1	Z-3		61	64	71	72	9	15	13	12	53	50	57	57	44	35	38	40	61	59	57	54	44	38	36	29			-10	-4	-4	6	4	8		-8	3	-7	-5	5	9		-3	-6	3	9	2	6
W-1	Z-4		55	57	58	59	28	27	32	35	68	62	82	79	9	6	8	6	83	79	80	76	17	18	25	20			-3	-4	-14	1	3	-8		-2	-8	-17	0	3	-2		-2	1	6	3	4	-1
W-1	Z-5		70	72	75	69	19	15	24	21	48	44	50	47	35	32	30	28	52	48	49	43	5	5	7	8			-5	-5	-2	5	3	-2		3	-6	-3	4	5	-3		-2	4	4	3	4	0
W-1	Z-6		54	54	58	56	34	33	28	28	64	67	68	67	16	12	19	18	58	58	53	58	12	15	11	8			-4	6	-4	-3	5	1		-2	5	0	-6	0	7		0	1	-3	4	0	-3
W-1	Z-7		61	63	60	60	21	20	18	15	57	58	62	62	18	18	21	22	70	69	72	72	15	14	14	9			1	3	-5	-3	-2	1		3	5	-4	-4	-3	5		-2	1	-1	0	1	1
W-1	Z-8		64	64	60	65	26	29	20	22	60	60	52	52	20	15	18	15	53	47	54	48	31	36	31	35			4	6	8	2	-1	0		-1	7	8	0	-1	1		0	-3	0	5	6	-5
W-1	Z-9		69	68	68	66	14	13	14	11	52	49	48	43	23	20	16	15	61	71	68	71	41	33	32	27			1	0	4	7	-7	9		2	2	6	5	0	6		1	1	3	3	-10	8
W-1	Z-10		56	53	52	53	27	25	30	34	64	65	63	63	17	10	17	17	73	62	70	73	19	23	39	30			4	-3	1	0	3	-20		0	-9	2	-7	-11	-7		3	2	-1	7	11	-4
W-1	Z-11		53	59	57	57	40	39	36	37	77	73	69	68	8	7	14	6	64	63	69	73	21	19	17	17			-4	4	8	-6	-5	4		2	2	5	1	-10	2		-6	1	4	1	1	2
W-1	Z-12		65	61	68	70	14	13	18	16	48	49	49	47	29	28	29	25	51	62	55	64	17	12	20	17			-3	-4	-1	0	-4	-3		-9	-3	2	3	-2	-5		4	1	-1	1	-11	5
W-2	Z-1		46	47	54	50	7	10	8	8	75	70	71	73	33	36	33	31	59	61	61	61	19	18	16	18			-8	-1	4	0	-2	3		-3	2	-3	5	0	0		-1	-3	5	-3	-2	1
W-2	Z-2		54	56	45	48	5	10	7	11	84	80	85	85	33	35	31	29	61	58	54	55	21	21	26	28			9	-2	-1	2	7	-5		8	-1	-5	6	3	-7		-2	-5	4	-2	3	0
W-2	Z-3		65	61	66	62	10	11	12	8	48	45	52	50	29	30	25	25	64	64	60	60	51	53	49	52			-1	-2	-4	4	4	2		-1	3	-5	5	4	1		4	-1	3	-1	0	-2
W-2	Z-4		59	59	56	55	27	25	27	25	66	65	80	77	10	10	8	13	77	63	76	70	14	14	13	13			3	0	-14	4	1	1		4	0	-12	-3	-7	1		0	2	1	0	14	0
W-2	Z-5		76	73	71	72	17	23	15	17	56	57	56	49	22	25	19	24	51	45	48	50	6	2	4	4			5	2	0	4	3	2		1	6	8	1	-5	-2		3	-6	-1	-3	6	4
W-2	Z-6		55	53	55	52	30	29	30	31	71	70	71	69	15	14	14	12	49	49	50	51	8	12	9	10			0	0	0	4	-1	-1		1	-2	1	2	-2	2		2	1	1	1	0	-4
W-2	Z-7		60	59	60	60	18	18	22	23	57	54	61	54	19	16	15	16	68	67	74	68	10	13	9	11			0	-4	-4	4	-6	1		-1	-5	0	0	-1	2		1	0	3	3	1	-3
W-2	Z-8		59	60	65	64	24	24	27	31	57	59	67	67	18	19	19	16	49	46	45	48	38	35	36	37			-6	-3	-10	4	4	2		-4	-7	-8	3	-2	-2		-1	0	-2	-1	3	3
W-2	Z-9		69	67	67	63	16	12	15	18	48	47	48	49	17	19	17	17	70	69	74	72	22	28	28	28			2	1	0	4	-4	-6		4	-6	-2	2	-3	0		2	4	1	-2	1	-6
W-2	Z-10		52	51	55	53	30	33	25	26	58	56	66	61	18	12	17	16	71	69	66	66	25	21	24	25			-3	5	-8	4	5	1		-2	7	-5	-4	3	-4		1	-3	2	6	2	4
W-2	Z-11		58	58	59	60	32	30	26	31	66	66	70	72	10	8	9	11	59	58	69	67	14	17	10	14			-1	6	-4	4	-10	4		-2	-1	-6	-3	-9	3		0	2	0	2	1	-3
W-2	Z-12		72	66	70	66	14	9	14	15	45	47	41	43	22	22	25	24	61	65	61	65	19	18	18	17			2	0	4	4	0	1		0	-6	4	-2	0	1		6	5	-2	0	-4	1
W-3	Z-1		49	45	47	46	6	8	8	10	74	76	71	71	35	36	32	30	59	64	63	67	18	17	18	19			2	-2	3	4	-4	0		-1	-6	5	6	-3	-2		4	-2	-2	-1	-5	1
W-3	Z-2		50	52	51	50	11	12	7	9	72	71	71	79	29	37	30	20	64	70	54	61	34	33	26	27			-1	4	1	4	10	8		2	-6	-8	17	9	6		-2	-1	1	-8	-6	1
W-3	Z-3		62	62	68	68	15	13	12	9	48	46	49	52	33	32	38	33	50	54	54	57	31	35	36	41			-6	3	-1	4	-4	-5		-6	-6	-6	-1	-3	-6		0	2	2	1	-4	-4
W-3	Z-4		56	56	51	45	24	21	25	26	69	73	76	75	7	1	6	6	67	67	71	66	17	12	13	14			5	-1	-7	4	-4	4		11	-6	-2	-5	1	-2		0	3	-4	6	0	5
W-3	Z-5		72	68	74	68	15	19	23	22	57	58	51	48	23	23	18	22	54	52	46	46	10	7	9	8			-2	-8	6	4	8	1		0	-6	10	1	6	-1		4	-4	-1	0	2	3
W-3	Z-6		55	53	54	50	32	27	31	29	62	60	59	58	9	11	18	17	48	53	48	47	12	13	10	10			1	1	3	4	0	2		3	-6	2	-6	6	3		2	5	2	-2	-5	-1
W-3	Z-7		62	59	64	62	23	21	22	17	56	51	49	50	17	18	18	18	65	63	69	68	16	14	14	12			-2	1	7	4	-4	2		-3	-6	1	0	-5	2		3	2	5	-1	2	2
W-3	Z-8		66	62	62	58	27	24	20	23	58	53	50	51	16	11	17	15	43	42	54	54	38	37	39	38			4	7	8	4	-11	-1		4	-6	2	-4	-12	-1		4	3	5	5	1	1
W-3	Z-9		67	69	66	63	17	13	14	16	47	47	46	48	11	10	17	17	73	70	70	69	27	28	29	29			1	3	1	4	3	-2		6	-6	-1	-7	1	-1		-2	4	0	1	3	-1
W-3	Z-10		45	46	50	51	27	27	30	28	63	63	58	61	18	18	20	17	59	66	67	71	27	29	26	24			-5	-3	5	4	-8	1		-5	-6	2	1	-5	5		-1	0	0	0	-7	-2
W-3	Z-11		52	51	56	58	34	30	39	40	62	61	63	63	11	12	12	9	62	63	62	62	16	13	22	21			-4	-5	-1	4	0	-6		-7	-6	-2	3	1	-8		1	4	1	-1	-1	3
W-3	Z-12		66	67	68	69	11	16	12	16	43	42	49	42	24	18	22	18	66	65	67	66	17	18	13	14			-2	-1	-6	4	-1	4		-2	-6	0	0	-1	4		-1	-5	1	6	1	-1
W-4	Z-1		51	45	49	49	10	9	13	5	67	70	75	68	27	32	28	26	60	62	59	64	19	20	18	17			2	-3	-8	4	1	1		-4	-6	2	6	-2	3		6	1	-3	-5	-2	-1
W-4	Z-2		53	48	49	47	13	10	10	6	76	75	69	69	34	34	22	27	63	58	54	55	19	25	24	25			4	3	7	4	9	-5		1	-6	6	7	3	0		5	3	1	0	5	-6
W-4	Z-3		65	64	62	61	11	12	18	14	51	47	50	49	36	35	33	33	63	59	58	57	39	45	42	42			3	-7	1	4	5	-3		3	-6	-2	2	2	3		1	-1	4	1	4	-6
W-4	Z-4		59	57	53	49	28	28	22	20	70	71	70	67	8	5	17	19	79	70	88	86	11	11	14	17			6	6	0	4	-9	-3		8	-6	4	-14	-16	-6		2	0	-1	3	9	0
W-4	Z-5		64	63	68	61	18	17	14	17	49	50	61	61	22	26	27	29	42	42	40	37	11	6	6	8			-4	4	-12	4	2	5		2	-6	-11	-3	5	-2		1	1	-1	-4	0	5
W-4	Z-6		53	52	56	58	30	29	29	28	56	57	58	57	9	12	13	15	54	52	56	53	9	8	12	11			-3	1	-2	4	-2	-3		-6	-6	0	-3	-1	-3		1	1	-1	-3	2	1
W-4	Z-7		53	52	61	56	12	15	16	17	45	53	55	57	15	12	14	16	69	69	65	72	9	8	11	10			-8	-4	-10	4	4	-2		-4	-6	-4	-4	-3	-2		1	-3	-8	3	0	1
W-4	Z-8		57	55	59	56	25	26	19	22	50	54	65	63	18	16	17	15	50	49	43	48	22	31	27	31			-2	6	-15	4	7	-5		-1	-6	-9	1	1	0		2	-1	-4	2	1	-9
W-4	Z-9		68	68	68	66	14	13	9	10	51	51	53	50	20	21	21	20	57	69	58	69	25	27	24	27			0	5	-2	4	-1	1		2	-6	1	1	0	0		0	1	0	-1	-12	-2
W-4	Z-10		49	46	51	50	24	25	25	25	60	59	63	62	16	9	17	8	63	63	73	69	22	19	23	29			-2	-1	-3	4	-10	-1		-4	-6	-3	1	-6	-10		3	-1	1	7	0	3
W-4	Z-11		56	53	60	53	33	30	39	38	65	64	50	56	14	10	17	18	67	65	47	56	16	18	12	17			-4	-6	15	4	20	4		0	-6	8	-8	9	1		3	3	1	4	2	-2
W-4	Z-12		69	66	71	65	14	10	14	11	46	39	51	47	27	24	24	25	59	59	61	64	17	15	13	21			-2	0	-5	4	-2	4		1	-6	-8	-1	-5	-6		3	4	7	3	0	2
W-5	Z-1		56	49	45	47	10	8	9	11	70	71	73	75	29	30	33	41	62	60	63	64	16	15	17	16			11	1	-3	4	-1	-1		2	-6	-4	-11	-4	-1		7	2	-1	-1	2	1
W-5	Z-2		45	54	43	46	9	10	9	10	71	74	74	78	20	22	34	34	53	58	50	62	18	18	26	15			2	0	-3	4	3	-8		8	-6	-4	-12	-4	3		-9	-1	-3	-2	-5	0
W-5	Z-3		60	63	65	67	19	21	17	18	53	52	53	50	35	36	36	34	60	46	41	43	41	44	43	46			-5	2	0	4	19	-2		-4	-6	2	2	3	-2		-3	-2	1	-1	14	-3
W-5	Z-4		58	60	62	59	29	27	27	31	68	70	73	71	10	13	14	11	80	80	75	78	11	9	10	11			-4	2	-5	4	5	1		1	-6	-1	2	2	-2		-2	2	-2	-3	0	2
W-5	Z-5		70	69	70	72	19	23	16	19	49	46	50	54	35	29	25	31	43	49	53	51	17	19	12	9			0	3	-1	4	-10	5		-3	-6	-8	-2	-2	10		1	-4	3	6	-6	-2
W-5	Z-6		53	55	51	54	30	31	28	35	59	65	59	64	15	15	15	14	48	50	49	59	11	13	14	15			2	2	0	4	-1	-3		1	-6	1	1	-9	-2		-2	-1	-6	0	-2	-2
W-5	Z-7		58	60	59	61	17	21	17	21	53	55	48	52	19	21	20	22	68	65	65	69	15	14	12	16			-1	0	5	4	3	3		-1	-6	3	-1	-4	-2		-2	-4	-2	-2	3	1
W-5	Z-8		60	63	65	70	36	36	21	30	50	53	47	52	18	21	17	25	45	50	46	50	31	40	28	32			-5	15	3	4	-1	3		-7	-6	1	-4	0	8		-3	0	-3	-3	-5	-9
W-5	Z-9		67	70	69	71	15	15	13	15	45	53	53	51	24	28	14	24	60	70	73	70	37	33	27	33			-2	2	-8	4	-13	10		-1	-6	2	4	0	0		-3	0	-8	-4	-10	4
W-5	Z-10		54	53	48	50	32	37	27	32	57	60	59	61	16	13	18	15	62	66	70	69	26	27	31	30			6	5	-2	4	-8	-5		3	-6	-1	-2	-3	-3		1	-5	-3	3	-4	-1
W-5	Z-11		50	51	59	61	32	36	43	34	75	76	70	71	5	7	13	12	63	67	63	64	27	18	16	16			-9	-11	5	4	0	11		-10	-6	5	-5	3	2		-1	-4	-1	-2	-4	9
W-5	Z-12		66	66	67	67	13	15	12	16	48	50	45	46	23	24	27	28	61	64	58	63	17	21	19	20			-1	1	3	4	3	-2		-1	-6	4	-4	1	1		0	-2	-2	-1	-3	-4
W-6	Z-1		43	47	47	48	9	8	6	6	66	74	75	76	28	35	27	28	59	62	62	67	19	16	22	19			-4	3	-9	4	-3	-3		-1	-6	-2	7	-5	-3		-4	1	-8	-7	-3	3
W-6	Z-2		39	46	46	47	10	12	6	6	79	78	75	70	50	50	41	41	51	54	39	54	14	14	28	30			-7	4	4	4	12	-14		-1	-6	8	9	0	-16		-7	-2	1	0	-3	0
W-6	Z-3		63	63	64	65	8	10	12	16	50	49	41	44	28	30	30	34	53	56	57	55	38	42	40	38			-1	-4	9	4	-4	-2		-2	-6	5	-4	1	4		0	-2	1	-2	-3	-4
W-6	Z-4		50	52	52	56	26	29	21	23	67	70	74	70	12	12	11	14	75	78	76	80	15	14	10	6			-2	5	-7	4	-1	5		-4	-6	0	-2	-2	8		-2	-3	-3	0	-3	1
W-6	Z-5		76	72	69	74	15	17	20	24	62	61	49	51	27	24	24	25	33	39	43	46	11	11	10	8			7	-5	13	4	-10	1		-2	-6	10	-1	-7	3		4	-2	1	3	-6	0
W-6	Z-6		53	55	52	53	26	32	28	27	60	70	61	62	6	8	13	10	47	54	51	50	11	10	9	11			1	-2	-1	4	-4	2		2	-6	8	-2	4	-1		-2	-6	-10	-2	-7	1
W-6	Z-7		57	58	57	61	15	18	19	19	54	59	51	56	11	16	20	19	68	67	65	71	16	16	16	14			0	-4	3	4	3	0		-3	-6	3	-3	-4	2		-1	-3	-5	-5	1	0
W-6	Z-8		52	59	59	60	27	34	20	22	54	53	59	64	22	20	19	12	50	49	47	46	29	28	25	25			-7	7	-5	4	3	4		-1	-6	-11	8	3	3		-7	-7	1	2	1	1
W-6	Z-9		68	65	63	66	9	13	15	14	47	49	53	55	16	16	17	19	69	70	68	69	31	30	23	25			5	-6	-6	4	1	8		-1	-6	-6	-3	1	5		3	-4	-2	0	-1	1
W-6	Z-10		51	51	50	53	25	28	28	32	60	62	61	64	16	16	18	14	65	65	62	65	29	22	17	20			1	-3	-1	4	3	12		-2	-6	-2	2	0	2		0	-3	-2	0	0	7
W-6	Z-11		54	56	56	57	27	32	30	38	62	64	78	79	10	11	7	5	71	70	66	62	18	18	29	22			-2	-3	-16	4	5	-11		-1	-6	-15	6	8	-4		-2	-5	-2	-1	1	0
W-6	Z-12		69	68	62	67	15	16	18	18	47	47	48	46	27	25	27	25	61	64	60	62	16	14	14	16			7	-3	-1	4	1	2		1	-6	1	0	2	-2		1	-1	0	2	-3	2
W-7	Z-1		50	50	48	48	11	10	10	10	75	76	70	72	26	29	39	43	64	65	59	60	19	21	16	15			2	1	5	4	5	3		2	-6	4	-14	5	6		0	1	-1	-3	-1	-2
W-7	Z-2		52	52	48	47	14	5	15	14	73	71	73	72	30	31	40	41	51	50	49	50	23	26	26	24			4	-1	0	4	2	-3		5	-6	-1	-10	0	2		0	9	2	-1	1	-3
W-7	Z-3		64	64	65	66	13	14	13	14	50	49	49	45	31	35	37	37	45	51	50	50	41	40	49	51			-1	0	1	4	-5	-8		-2	-6	4	-2	1	-11		0	-1	1	-4	-6	1
W-7	Z-4		57	58	57	59	26	25	27	25	73	72	74	77	5	7	2	4	78	76	80	83	9	12	10	9			0	-1	-1	4	-2	-1		-1	-6	-5	3	-7	3		-1	1	1	-2	2	-3
W-7	Z-5		73	72	72	70	14	13	19	11	54	52	55	53	22	30	28	31	43	42	49	50	9	9	3	7			1	-5	-1	4	-6	6		2	-6	-1	-1	-8	2		1	1	2	-8	1	0
W-7	Z-6		52	52	53	53	28	29	30	31	63	65	54	58	12	13	9	8	55	54	46	45	11	10	11	10			-1	-2	9	4	9	0		-1	-6	7	5	9	0		0	-1	-2	-1	1	1
W-7	Z-7		59	61	59	61	17	18	18	20	56	57	57	58	21	21	10	15	66	67	68	66	11	14	11	11			0	-1	-1	4	-2	0		0	-6	-1	6	1	3		-2	-1	-1	0	-1	-3
W-7	Z-8		64	65	65	65	28	29	18	18	57	56	55	56	19	18	21	16	48	48	49	46	38	35	35	31			-1	10	2	4	-1	3		0	-6	0	2	2	4		-1	-1	1	1	0	3
W-7	Z-9		71	71	73	72	16	11	12	14	51	52	53	54	20	22	17	19	70	75	66	70	29	27	24	24			-2	4	-2	4	4	5		-1	-6	-2	3	5	3		0	5	-1	-2	-5	2
W-7	Z-10		53	53	51	50	26	28	27	30	60	63	64	59	19	18	17	15	65	66	67	71	22	25	20	17			2	-1	-4	4	-2	2		3	-6	4	3	-5	8		0	-2	-3	1	-1	-3
W-7	Z-11		59	60	61	63	39	40	41	42	78	80	76	75	14	13	7	6	61	62	66	65	16	16	23	26			-2	-2	2	4	-5	-7		-3	-6	5	7	-3	-10		-1	-1	-2	1	-1	0
W-7	Z-12		68	66	69	69	12	14	14	15	44	45	47	46	22	23	26	26	64	65	65	64	15	16	14	11			-1	-2	-3	4	-1	1		-3	-6	-1	-3	1	5		2	-2	-1	-1	-1	-1
W-8	Z-1		51	50	49	48	5	7	6	6	72	71	74	78	28	37	30	36	65	64	58	56	14	19	20	20			2	-1	-2	4	7	-6		2	-6	-7	1	8	-1		1	-2	1	-9	1	-5
W-8	Z-2		50	52	51	52	12	16	11	16	74	76	73	78	43	45	45	46	62	61	55	61	14	28	26	29			-1	1	1	4	7	-12		0	-6	-2	-1	0	-1		-2	-4	-2	-2	1	-14
W-8	Z-3		66	66	66	70	10	18	11	12	45	48	46	51	34	44	30	39	52	55	49	55	43	43	46	51			0	-1	-1	4	3	-3		-4	-6	-3	5	0	-8		0	-8	-3	-10	-3	0
W-8	Z-4		55	52	55	58	30	34	20	29	69	73	80	77	4	11	4	8	80	81	75	79	8	14	9	9			0	10	-11	4	5	-1		-6	-6	-4	3	2	5		3	-4	-4	-7	-1	-6
W-8	Z-5		78	73	72	72	18	23	15	20	57	59	51	54	22	25	24	29	41	41	48	48	10	7	5	8			6	3	6	4	-7	5		1	-6	5	-4	-7	-1		5	-5	-2	-3	0	3
W-8	Z-6		54	58	55	56	25	29	31	32	61	61	61	64	14	12	11	10	51	52	48	49	19	15	14	14			-1	-6	0	4	3	5		2	-6	-3	2	3	1		-4	-4	0	2	-1	4
W-8	Z-7		58	58	62	61	19	19	19	22	54	56	53	55	16	18	18	22	68	65	68	68	14	11	18	20			-4	0	1	4	0	-4		-3	-6	1	-4	-3	-9		0	0	-2	-2	3	3
W-8	Z-8		60	60	64	65	25	25	20	25	60	59	61	58	17	19	13	15	52	54	51	43	34	28	26	27			-4	5	-1	4	1	8		-5	-6	1	4	11	1		0	0	1	-2	-2	6
W-8	Z-9		64	68	72	71	12	10	11	12	51	55	52	51	19	20	16	20	71	76	65	69	25	29	28	30			-8	1	-1	4	6	-3		-3	-6	4	0	7	-1		-4	2	-4	-1	-5	-4
W-8	Z-10		54	55	51	54	28	29	25	26	63	63	54	62	15	16	13	14	70	68	79	72	23	23	25	27			3	3	9	4	-9	-2		1	-6	1	2	-4	-4		-1	-1	0	-1	2	0
W-8	Z-11		60	60	58	57	45	46	28	33	71	69	74	75	1	0	1	-1	56	68	57	64	14	22	14	20			2	17	-3	4	-1	0		3	-6	-6	1	4	2		0	-1	2	1	-12	-8
W-8	Z-12		66	70	65	70	7	16	13	14	41	49	47	49	23	28	21	28	66	61	66	67	15	19	16	17			1	-6	-6	4	0	-1		0	-6	0	0	-6	2		-4	-9	-8	-5	5	-4
W-9	Z-1		47	46	46	46	7	7	8	8	74	74	78	73	30	34	32	31	66	62	64	64	18	20	17	19			1	-1	-4	4	2	1		0	-6	1	3	-2	1		1	0	0	-4	4	-2
W-9	Z-2		54	50	46	51	10	10	12	13	75	76	91	72	36	35	32	34	50	46	65	65	22	25	24	26			8	-2	-16	4	-15	-2		-1	-6	4	1	-19	-1		4	0	-1	1	4	-3
W-9	Z-3		67	63	69	66	15	14	8	10	54	56	50	53	36	37	35	38	47	49	61	55	43	42	36	36			-2	7	4	4	-14	7		-3	-6	3	-1	-6	6		4	1	-2	-1	-2	1
W-9	Z-4		58	57	52	54	20	17	19	16	70	67	67	69	11	6	6	10	84	82	75	77	11	10	8	16			6	1	3	4	9	3		3	-6	-2	-4	5	-6		1	3	3	5	2	1
W-9	Z-5		68	71	71	70	20	19	13	15	56	53	46	51	29	30	22	23	52	52	49	48	7	10	10	9			-3	7	10	4	3	-3		1	-6	2	7	4	1		-3	1	3	-1	0	-3
W-9	Z-6		55	51	50	51	29	28	29	28	61	59	62	65	17	16	7	9	46	50	52	51	11	11	13	12			5	0	-1	4	-6	-2		0	-6	-6	7	-1	-1		4	1	2	1	-4	0
W-9	Z-7		64	60	60	57	21	21	16	20	56	56	54	51	16	19	15	17	67	69	73	66	13	17	10	11			4	5	2	4	-6	3		3	-6	5	2	3	6		4	0	0	-3	-2	-4
W-9	Z-8		62	60	60	57	19	20	27	23	61	54	51	52	20	22	17	18	49	51	47	44	44	32	33	30			2	-8	10	4	2	11		3	-6	2	4	7	2		2	-1	7	-2	-2	12
W-9	Z-9		64	64	66	60	10	9	9	9	41	44	45	45	16	15	21	21	70	65	60	59	30	28	37	36			-2	1	-4	4	10	-7		4	-6	-1	-6	6	-8		0	1	-3	1	5	2
W-9	Z-10		47	45	51	49	26	26	25	28	58	58	59	61	16	14	18	14	60	59	73	70	25	28	20	17			-4	1	-1	4	-13	5		-4	-6	-3	0	-11	11		2	0	0	2	1	-3
W-9	Z-11		60	58	58	59	35	37	36	35	69	64	68	68	12	8	5	4	68	69	58	56	18	20	19	17			2	-1	1	4	10	-1		-1	-6	-4	4	13	3		2	-2	5	4	-1	-2
W-9	Z-12		72	67	70	67	13	13	10	8	50	45	44	46	27	26	23	28	63	62	66	65	14	16	15	18			2	3	6	4	-3	-1		0	-6	-1	-2	-3	-2		5	0	5	1	1	-2
W-10	Z-1		44	47	44	46	10	7	9	6	72	73	72	73	34	37	31	32	57	60	63	62	20	19	16	16			0	1	0	4	-6	4		1	-6	0	5	-2	3		-3	3	-1	-3	-3	1
W-10	Z-2		47	51	54	53	12	14	10	19	76	75	68	67	43	45	30	36	55	57	58	56	21	26	22	22			-7	2	8	4	-3	-1		-2	-6	8	9	1	4		-4	-2	1	-2	-2	-5
W-10	Z-3		63	66	63	62	9	11	9	11	44	43	44	44	32	36	34	34	52	52	48	41	43	45	37	37			0	0	0	4	4	6		4	-6	-1	2	11	8		-3	-2	1	-4	0	-2
W-10	Z-4		56	55	53	54	18	22	27	26	69	72	65	65	3	2	5	5	72	75	69	74	14	11	13	12			3	-9	4	4	3	1		1	-6	7	-3	1	-1		1	-4	-3	1	-3	3
W-10	Z-5		67	71	69	71	10	14	15	16	57	58	57	58	26	27	31	25	47	46	47	43	5	2	5	3			-2	-5	0	4	0	0		0	-6	0	2	3	-1		-4	-4	-1	-1	1	3
W-10	Z-6		53	53	53	53	27	25	27	26	61	63	54	60	6	5	7	7	46	47	48	46	8	11	10	14			0	0	7	4	-2	-2		0	-6	3	-2	1	-3		0	2	-2	1	-1	-3
W-10	Z-7		58	58	55	56	17	20	17	16	55	53	51	50	14	16	15	16	68	66	75	72	11	10	13	16			3	0	4	4	-7	-2		2	-6	3	0	-6	-6		0	-3	2	-2	2	1
W-10	Z-8		60	57	56	58	20	21	25	25	62	64	54	54	15	16	23	22	40	41	46	47	31	34	32	31			4	-5	8	4	-6	-1		-1	-6	10	-6	-6	3		3	-1	-2	-1	-1	-3
W-10	Z-9		70	68	73	71	11	12	8	12	46	44	48	50	18	21	20	19	72	70	70	68	31	33	31	28			-3	3	-2	4	2	0		-3	-6	-6	2	2	5		2	-1	2	-3	2	-2
W-10	Z-10		50	51	51	51	28	30	25	26	57	61	60	61	18	14	19	20	69	66	72	66	25	25	27	27			-1	3	-3	4	-3	-2		0	-6	0	-6	0	-2		-1	-2	-4	4	3	0
W-10	Z-11		55	60	58	60	35	38	29	31	67	68	73	71	12	14	9	8	66	69	71	73	17	20	21	29			-3	6	-6	4	-5	-4		0	-6	-3	6	-4	-9		-5	-3	-1	-2	-3	-3
W-10	Z-12		67	67	68	67	16	12	11	15	46	47	45	49	24	26	23	25	70	66	66	69	13	17	10	16			-1	5	1	4	4	3		0	-6	-2	1	-3	1		0	4	-1	-2	4	-4
Z-1	W-1		47	50	46	48	9	8	5	8	77	78	76	70	36	40	29	31	59	64	59	60	17	14	22	23			1	4	1	4	0	-5		2	-6	8	9	4	-9		-3	1	-1	-4	-5	3
Z-1	W-2		43	43	43	45	7	7	9	5	73	75	75	73	32	38	27	28	60	59	60	59	23	18	24	18			0	-2	-2	4	0	-1		-2	-6	2	10	0	0		0	0	-2	-6	1	5
Z-1	W-3		67	65	65	63	10	9	7	10	55	53	51	52	31	25	31	29	59	58	49	46	34	36	34	36			2	3	4	4	10	0		2	-6	1	-4	12	0		2	1	2	6	1	-2
Z-1	W-4		48	51	52	52	21	25	20	26	64	64	69	70	10	6	8	8	70	65	64	66	13	14	18	14			-4	1	-5	4	6	-5		-1	-6	-6	-2	-1	0		-3	-4	0	4	5	-1
Z-1	W-5		90	78	81	79	12	19	9	12	55	67	52	65	21	21	15	15	51	52	56	50	10	13	5	7			9	3	3	4	-5	5		-1	-6	2	6	2	6		12	-7	-12	0	-1	-3
Z-1	W-6		58	60	56	58	30	32	31	30	61	63	62	65	8	10	10	10	56	57	54	50	8	12	8	9			2	-1	-1	4	2	0		2	-6	-2	0	7	3		-2	-2	-2	-2	-1	-4
Z-1	W-7		59	60	64	64	11	14	12	19	55	56	67	66	15	11	12	17	74	73	74	74	16	15	9	13			-5	-1	-12	4	0	7		-4	-6	-10	-6	-1	2		-1	-3	-1	4	1	1
Z-1	W-8		70	73	63	64	13	16	22	25	67	71	61	65	14	18	24	28	58	59	47	51	30	31	42	42			7	-9	6	4	11	-12		9	-6	6	-10	8	-11		-3	-3	-4	-4	-1	-1
Z-1	W-9		72	63	69	67	9	12	7	12	50	51	46	54	22	25	19	23	67	64	65	67	27	30	23	32			3	2	4	4	2	4		-4	-6	-3	2	-3	-2		9	-3	-1	-3	3	-3
Z-1	W-10		50	54	51	51	25	28	25	24	59	62	62	65	9	10	10	11	68	70	70	68	27	26	29	24			-1	0	-3	4	-2	-2		3	-6	-3	-1	2	2		-4	-3	-3	-1	-2	1
Z-1	W-11		60	62	64	61	25	28	28	27	66	72	64	68	8	12	9	13	56	55	59	58	23	23	24	26			-4	-3	2	4	-3	-1		1	-6	4	-1	-3	-3		-2	-3	-6	-4	1	0
Z-1	W-12		72	74	71	73	17	21	17	20	49	52	46	48	24	25	18	22	74	70	75	74	22	21	27	26			1	0	3	4	-1	-5		1	-6	4	3	-4	-5		-2	-4	-3	-1	4	1
Z-2	W-1		48	49	48	45	5	5	9	7	70	70	51	69	28	35	32	35	54	65	57	61	19	26	16	20			0	-4	19	4	-3	3		4	-6	1	0	4	6		-1	0	0	-7	-11	-7
Z-2	W-2		45	42	46	41	8	9	8	8	71	73	70	78	30	30	23	29	52	57	63	60	21	23	22	25			-1	0	1	4	-11	-1		1	-6	-5	1	-3	-2		3	-1	-2	0	-5	-2
Z-2	W-3		66	66	62	65	11	10	9	10	54	56	49	49	34	35	30	40	50	48	52	56	40	44	37	32			4	2	5	4	-2	3		1	-6	7	-5	-8	12		0	1	-2	-1	2	-4
Z-2	W-4		48	56	41	56	22	28	28	35	60	70	66	69	15	15	20	12	70	67	73	72	15	13	19	16			7	-6	-6	4	-3	-4		0	-6	1	3	-5	-3		-8	-6	-10	0	3	2
Z-2	W-5		68	75	63	75	11	12	11	15	59	64	63	68	20	25	20	25	45	56	36	49	10	12	22	21			5	0	-4	4	9	-12		0	-6	-4	0	7	-9		-7	-1	-5	-5	-11	-2
Z-2	W-6		53	56	49	60	31	35	29	35	57	69	62	65	9	15	8	10	56	58	60	55	11	10	16	10			4	2	-5	4	-4	-5		-4	-6	4	5	3	0		-3	-4	-12	-6	-2	1
Z-2	W-7		55	64	60	65	13	12	14	20	54	67	50	60	20	24	20	21	62	68	70	65	12	16	22	12			-5	-1	4	4	-8	-10		-1	-6	7	3	3	4		-9	1	-13	-4	-6	-4
Z-2	W-8		68	69	56	66	15	21	22	24	59	63	57	73	23	30	27	32	56	59	54	60	31	41	40	46			12	-7	2	4	2	-9		3	-6	-10	-2	-1	-5		-1	-6	-4	-7	-3	-10
Z-2	W-9		60	65	68	61	17	12	9	12	59	58	56	59	21	27	24	30	67	70	65	72	33	40	44	44			-8	8	3	4	2	-11		4	-6	-1	-3	-2	-4		-5	5	1	-6	-3	-7
Z-2	W-10		55	54	51	52	30	32	27	27	57	65	54	62	16	14	13	14	64	66	66	74	24	32	28	24			4	3	3	4	-2	-4		2	-6	3	0	-8	8		1	-2	-8	2	-2	-8
Z-2	W-11		61	58	57	57	29	32	26	25	70	78	62	68	6	12	13	20	63	59	63	57	26	24	19	32			4	3	8	4	0	7		1	-6	10	-8	2	-8		3	-3	-8	-6	4	2
Z-2	W-12		70	71	72	73	17	20	18	20	44	51	44	52	22	30	20	25	72	76	75	77	20	24	22	25			-2	-1	0	4	-3	-2		-2	-6	-1	5	-1	-1		-1	-3	-7	-8	-4	-4
Z-3	W-1		47	48	53	49	11	4	6	6	65	69	68	70	36	39	31	33	55	56	59	55	20	21	13	13			-6	5	-3	4	-4	7		-1	-6	-1	6	1	8		-1	7	-4	-3	-1	-1
Z-3	W-2		46	46	41	42	8	5	7	5	75	77	74	71	35	35	27	34	54	49	58	55	24	24	20	19			5	1	1	4	-4	4		4	-6	6	1	-6	5		0	3	-2	0	5	0
Z-3	W-3		57	59	59	62	5	7	5	10	40	44	39	41	34	40	40	38	51	46	50	51	27	29	30	33			-2	0	1	4	1	-3		-3	-6	3	2	-5	-4		-2	-2	-4	-6	5	-2
Z-3	W-4		48	50	48	53	20	25	21	25	65	66	63	70	11	10	14	5	69	70	69	70	10	11	16	14			0	-1	2	4	0	-6		-3	-6	-4	5	0	-3		-2	-5	-1	1	-1	-1
Z-3	W-5		77	79	78	80	13	14	10	11	54	57	55	59	18	20	19	15	46	46	43	45	6	6	14	15			-1	3	-1	4	3	-8		-1	-6	-2	5	1	-9		-2	-1	-3	-2	0	0
Z-3	W-6		54	55	58	55	34	35	31	35	64	64	61	61	14	10	18	20	46	50	50	50	16	10	10	8			-4	3	3	4	-4	6		0	-6	3	-10	0	2		-1	-1	0	4	-4	6
Z-3	W-7		60	60	64	65	17	18	13	15	50	54	54	58	19	20	13	15	68	74	73	70	10	20	7	12			-4	4	-4	4	-5	3		-5	-6	-4	5	4	8		0	-1	-4	-1	-6	-10
Z-3	W-8		66	71	59	58	20	19	24	19	58	62	61	64	23	28	21	29	60	58	49	51	37	35	36	38			7	-4	-3	4	11	1		13	-6	-2	-1	7	-3		-5	1	-4	-5	2	2
Z-3	W-9		70	70	72	70	8	10	18	15	58	61	55	55	27	33	22	23	66	62	66	65	35	35	28	33			-2	-10	3	4	0	7		0	-6	6	10	-3	2		0	-2	-3	-6	4	0
Z-3	W-10		49	52	56	54	27	21	27	30	56	59	59	59	14	12	14	12	67	65	69	69	27	21	26	21			-7	0	-3	4	-2	1		-2	-6	0	0	-4	0		-3	6	-3	2	2	6
Z-3	W-11		56	55	56	55	27	29	27	28	71	71	65	65	13	8	15	14	57	56	51	54	27	24	20	20			0	0	6	4	6	7		0	-6	6	-6	2	4		1	-2	0	5	1	3
Z-3	W-12		68	68	75	74	20	20	17	21	44	41	58	48	32	29	25	29	59	63	64	66	21	21	26	21			-7	3	-14	4	-5	-5		-6	-6	-7	0	-3	0		0	0	3	3	-4	0
Z-4	W-1		48	52	50	52	5	10	7	8	65	61	64	71	29	35	28	32	57	63	59	61	24	20	21	19			-2	-2	1	4	-2	3		0	-6	-10	3	2	1		-4	-5	4	-6	-6	4
Z-4	W-2		43	46	41	43	7	7	6	2	64	72	73	78	27	32	34	34	55	54	50	56	25	21	26	22			2	1	-9	4	5	-1		3	-6	-6	-2	-2	-1		-3	0	-8	-5	1	4
Z-4	W-3		56	60	61	64	3	7	6	5	46	54	52	55	38	38	31	36	46	44	45	47	36	33	32	34			-5	-3	-6	4	1	4		-4	-6	-1	2	-3	-1		-4	-4	-8	0	2	3
Z-4	W-4		53	50	47	49	27	25	23	26	57	68	63	68	12	9	13	7	70	70	65	71	15	13	14	15			6	4	-6	4	5	1		1	-6	0	2	-1	-2		3	2	-11	3	0	2
Z-4	W-5		62	66	71	69	9	9	14	10	50	57	54	60	20	22	23	22	48	43	54	51	13	11	9	10			-9	-5	-4	4	-6	4		-3	-6	-3	0	-8	1		-4	0	-7	-2	5	2
Z-4	W-6		53	52	54	56	28	31	31	29	70	69	62	62	9	12	6	7	55	56	46	43	5	6	5	9			-1	-3	8	4	9	0		-4	-6	7	5	13	-3		1	-3	1	-3	-1	-1
Z-4	W-7		58	65	56	62	12	14	15	16	54	57	56	60	17	14	15	17	68	66	65	72	11	10	8	14			2	-3	-2	4	3	3		3	-6	-3	-3	-6	-4		-7	-2	-3	3	2	1
Z-4	W-8		58	59	56	69	22	24	17	22	51	64	51	57	19	20	13	18	62	68	59	56	31	44	32	34			2	5	0	4	3	-1		-10	-6	7	2	12	10		-1	-2	-13	-1	-6	-13
Z-4	W-9		65	76	62	69	19	13	12	16	51	53	52	50	22	16	18	13	65	57	62	62	26	25	27	28			3	7	-1	4	3	-1		7	-6	3	3	-5	-3		-11	6	-2	6	8	1
Z-4	W-10		56	53	53	51	32	29	29	27	55	60	55	61	12	9	10	9	69	71	69	70	20	22	24	27			3	3	0	4	0	-4		2	-6	-1	0	1	-5		3	3	-5	3	-2	-2
Z-4	W-11		54	57	50	51	28	26	28	28	62	68	63	66	8	11	8	10	54	59	57	62	19	20	22	26			4	0	-1	4	-3	-3		6	-6	2	1	-3	-6		-3	2	-6	-3	-5	-1
Z-4	W-12		70	70	72	70	26	24	18	18	49	50	47	50	21	23	21	26	68	72	65	74	19	20	23	25			-2	8	2	4	3	-4		0	-6	0	-3	-2	-5		0	2	-1	-2	-4	-1
Z-5	W-1		47	49	47	49	7	6	11	9	67	66	68	70	35	30	34	32	55	56	60	58	24	15	26	17			0	-4	-1	4	-5	-2		0	-6	-4	-2	-2	-2		-2	1	1	5	-1	9
Z-5	W-2		41	44	40	42	4	5	7	9	76	80	71	76	30	31	33	37	52	55	57	54	20	20	23	21			1	-3	5	4	-5	-3		2	-6	4	-6	1	-1		-3	-1	-4	-1	-3	0
Z-5	W-3		58	55	55	59	9	11	8	8	43	47	45	44	37	37	24	26	48	47	46	52	35	41	39	31			3	1	-2	4	2	-4		-4	-6	3	11	-5	10		3	-2	-4	0	1	-6
Z-5	W-4		43	46	48	47	20	22	21	28	65	65	62	63	10	9	9	11	56	59	61	60	11	16	12	15			-5	-1	3	4	-5	-1		-1	-6	2	-2	-1	1		-3	-2	0	1	-3	-5
Z-5	W-5		69	72	69	70	26	28	15	18	61	69	56	59	22	22	9	13	61	53	56	59	8	7	9	7			0	11	5	4	5	-1		2	-6	10	9	-6	0		-3	-2	-8	0	8	1
Z-5	W-6		59	58	54	52	31	34	30	35	59	59	59	65	11	10	11	10	54	46	47	46	8	4	13	11			5	1	0	4	7	-5		6	-6	-6	0	0	-7		1	-3	0	1	8	4
Z-5	W-7		59	59	55	58	17	16	12	11	56	53	58	60	21	22	16	16	63	68	67	67	14	17	13	16			4	5	-2	4	-4	1		1	-6	-7	6	1	1		0	1	3	-1	-5	-3
Z-5	W-8		53	58	56	62	23	25	13	17	52	61	55	57	21	22	17	22	39	45	58	55	41	40	28	34			-3	10	-3	4	-19	13		-4	-6	4	0	-10	6		-5	-2	-9	-1	-6	1
Z-5	W-9		72	72	68	68	11	13	13	20	50	58	51	55	22	22	28	32	68	63	63	63	27	26	34	32			4	-2	-1	4	5	-7		4	-6	3	-10	0	-6		0	-2	-8	0	5	1
Z-5	W-10		53	53	51	53	25	27	24	25	56	58	55	60	11	8	10	7	71	69	69	62	30	23	26	24			2	1	1	4	2	4		0	-6	-2	1	7	-1		0	-2	-2	3	2	7
Z-5	W-11		56	55	52	54	26	31	21	30	66	65	60	66	18	11	9	10	61	55	55	56	19	25	22	20			4	5	6	4	6	-3		1	-6	-1	1	-1	5		1	-5	1	7	6	-6
Z-5	W-12		71	70	71	70	17	20	17	18	48	50	46	46	24	21	28	29	68	70	62	66	26	23	24	24			0	0	2	4	6	2		0	-6	4	-8	4	-1		1	-3	-2	3	-2	3
Z-6	W-1		56	52	53	51	6	10	7	5	71	74	73	71	31	38	40	45	59	59	61	64	18	21	23	21			3	-1	-2	4	-2	-5		1	-6	3	-7	-5	0		4	-4	-3	-7	0	-3
Z-6	W-2		44	50	49	49	8	7	5	10	71	74	71	74	31	35	29	32	57	57	60	60	20	19	21	24			-5	3	0	4	-3	-1		1	-6	0	3	-3	-5		-6	1	-3	-4	0	1
Z-6	W-3		55	61	58	62	7	12	5	7	52	56	53	53	38	42	30	34	48	53	35	46	40	43	29	34			-3	2	-1	4	13	11		-1	-6	3	8	7	9		-6	-5	-4	-4	-5	-3
Z-6	W-4		51	55	48	50	24	25	26	26	74	75	74	70	8	9	11	12	64	66	73	69	15	13	14	12			3	-2	0	4	-9	1		5	-6	5	-3	-3	1		-4	-1	-1	-1	-2	2
Z-6	W-5		73	75	72	73	13	12	13	18	61	67	60	64	25	24	24	26	47	53	49	55	14	12	14	14			1	0	1	4	-2	0		2	-6	3	-2	-2	-2		-2	1	-6	1	-6	2
Z-6	W-6		51	54	58	57	33	34	29	29	62	61	62	58	15	19	17	19	56	61	51	54	15	11	12	12			-7	4	0	4	5	3		-3	-6	3	0	7	-1		-3	-1	1	-4	-5	4
Z-6	W-7		65	64	63	64	20	18	21	20	56	59	62	59	20	24	19	16	72	78	74	73	13	14	12	13			2	-1	-6	4	-2	1		0	-6	0	8	5	1		1	2	-3	-4	-6	-1
Z-6	W-8		66	67	68	66	22	25	22	23	65	70	63	66	23	28	22	25	44	47	57	55	40	41	39	43			-2	0	2	4	-13	1		1	-6	4	3	-8	-2		-1	-3	-5	-5	-3	-1
Z-6	W-9		64	65	65	70	15	14	16	15	49	55	54	56	28	25	20	20	64	60	68	68	29	27	32	31			-1	-1	-5	4	-4	-3		-5	-6	-1	5	-8	-4		-1	1	-6	3	4	2
Z-6	W-10		57	56	52	54	26	27	25	27	62	64	61	64	14	14	16	12	68	71	68	70	24	30	29	29			5	1	1	4	0	-5		2	-6	0	2	1	1		1	-1	-2	0	-3	-6
Z-6	W-11		53	56	54	55	29	30	25	33	74	64	69	68	11	14	11	10	62	56	59	56	23	28	21	25			-1	4	5	4	3	2		1	-6	-4	4	0	3		-3	-1	10	-3	6	-5
Z-6	W-12		74	77	73	76	17	24	16	16	54	55	47	49	23	30	25	31	74	71	78	71	26	30	25	26			1	1	7	4	-4	1		1	-6	6	-1	0	4		-3	-7	-1	-7	3	-4
Z-7	W-1		50	49	55	55	6	6	9	10	69	67	73	72	30	28	42	41	64	58	62	59	19	16	22	21			-5	-3	-4	4	2	-3		-6	-6	-5	-13	-1	-5		1	0	2	2	6	3
Z-7	W-2		39	40	43	44	7	9	5	5	72	73	71	74	32	34	19	25	62	58	57	57	26	23	20	19			-4	2	1	4	5	6		-4	-6	-1	9	1	4		-1	-2	-1	-2	4	3
Z-7	W-3		59	57	58	59	3	2	6	4	52	51	44	45	32	34	36	38	54	54	55	56	29	29	38	40			1	-3	8	4	-1	-9		-2	-6	6	-4	-2	-11		2	1	1	-2	0	0
Z-7	W-4		51	49	48	48	24	21	31	25	67	67	70	68	11	8	13	8	73	70	75	74	8	13	16	17			3	-7	-3	4	-2	-8		1	-6	-1	0	-4	-4		2	3	0	3	3	-5
Z-7	W-5		69	67	80	79	17	16	16	13	60	57	58	57	23	26	18	20	47	51	49	53	11	15	22	20			-11	1	2	4	-2	-11		-12	-6	0	6	-2	-5		2	1	3	-3	-4	-4
Z-7	W-6		55	56	57	58	33	29	32	32	63	62	62	62	12	12	15	14	50	58	52	55	11	9	11	13			-2	1	1	4	-2	0		-2	-6	0	-2	3	-4		-1	4	1	0	-8	2
Z-7	W-7		64	60	57	59	17	17	19	17	55	56	54	58	13	17	18	23	66	74	66	80	16	18	15	16			7	-2	1	4	0	1		1	-6	-2	-6	-6	2		4	0	-1	-4	-8	-2
Z-7	W-8		63	67	62	61	13	15	22	19	60	55	63	62	21	21	26	25	56	53	63	62	41	37	45	44			1	-9	-3	4	-7	-4		6	-6	-7	-4	-9	-7		-4	-2	5	0	3	4
Z-7	W-9		67	72	74	71	14	12	13	17	47	45	52	51	20	20	21	23	72	70	73	68	29	28	30	29			-7	1	-5	4	-1	-1		1	-6	-6	-3	2	-1		-5	2	2	0	2	1
Z-7	W-10		47	50	53	52	28	25	29	29	59	59	64	62	10	8	10	6	67	64	71	68	25	29	26	24			-6	-1	-5	4	-4	-1		-2	-6	-3	2	-4	5		-3	3	0	2	3	-4
Z-7	W-11		52	53	54	56	27	26	27	28	68	67	70	67	11	11	12	12	59	57	58	58	24	25	24	24			-2	0	-2	4	1	0		-3	-6	0	-1	-1	1		-1	1	1	0	2	-1
Z-7	W-12		74	76	73	72	18	18	16	16	44	48	52	52	29	30	26	27	75	78	68	69	24	24	26	25			1	2	-8	4	7	-2		4	-6	-4	3	9	-1		-2	0	-4	-1	-3	0
Z-8	W-1		41	45	40	43	4	1	4		64	67	66	70	25	27	34	33	55	54	51	60	20	21	15	18			1	0	-2	4	4	5		2		-3	-6	-6	3		-4	3	-3	-2	1	-1
Z-8	W-2		46	44	41	40	4	8	17	12	72	73	69	70	23	25	29	31	58	57	61	60	16	17	29	21			5	-13	3	4	-3	-13		4	-4	3	-6	-3	-4		2	-4	-1	-2	1	-1
Z-8	W-3		54	60	69	67	2	3	7	5	53	54	47	50	26	31	30	30	47	51	48	50	31	39	26	30			-15	-5	6	4	-1	5		-7	-2	4	1	1	9		-6	-1	-1	-5	-4	-8
Z-8	W-4		49	49	46	50	20	21	16	20	59	62	65	67	5	3	8	11	72	60	56	59	12	11	13	13			3	4	-6	4	16	-1		-1	1	-5	-8	1	-2		0	-1	-3	2	12	1
Z-8	W-5		73	75	69	68	12	15	15	11	53	54	55	57	15	20	21	20	45	45	45	49	15	17	14	16			4	-3	-2	4	0	1		7	4	-3	0	-4	1		-2	-3	-1	-5	0	-2
Z-8	W-6		52	56	51	52	30	29	28	28	59	59	62	60	12	9	10	13	40	47	47	48	7	12	3	4			1	2	-3	4	-7	4		4	1	-1	-4	-1	8		-4	1	0	3	-7	-5
Z-8	W-7		54	60	56	54	14	15	11	12	46	51	49	52	12	15	11	14	59	69	59	67	7	7	12	15			-2	3	-3	4	0	-5		6	3	-1	1	2	-8		-6	-1	-5	-3	-10	0
Z-8	W-8		58	58	51	53	18	19	8	4	47	57	54	61	13	19	21	22	54	57	50	52	27	33	37	41			7	10	-7	4	4	-10		5	15	-4	-3	5	-8		0	-1	-10	-6	-3	-6
Z-8	W-9		70	68	68	70	11	14	13	16	54	49	46	49	21	21	26	20	65	59	55		24	24	25	24			2	-2	8	4	10	-1		-2	-2	0	1		0		2	-3	5	0	6	0
Z-8	W-10		50	54	50	46	27	28	24	24	54	60	55	58	15	6	8	7	72	70	68	66	24	23	17	24			0	3	-1	4	4	7		8	4	2	-1	4	-1		-4	-1	-6	9	2	1
Z-8	W-11		52	52	53	54	20	26	17	26	56	60	62	66	7	14	13	9	52	56	56	59	22	19	23	21			-1	3	-6	4	-4	-1		-2	0	-6	5	-3	-2		0	-6	-4	-7	-4	3
Z-8	W-12		78	78	71	73	18	22	19	21	43	42	45	50	29	28	29	31	54	64	57	56	22	22	17	15			7	-1	-2	4	-3	5		5	1	-8	-3	8	7		0	-4	1	1	-10	0
Z-9	W-1		46	48	46	47	4	2	6	7	68	77	72	72	32	33	29	35	55	58	62	58	19	19	26	23			0	-2	-4	4	-7	-7		1	-5	5	-2	0	-4		-2	2	-9	-1	-3	0
Z-9	W-2		44	44	44	43	1	6	5	6	74	74	74	73	26	27	30	30	61	60	63	61	22	21	24	22			0	-4	0	4	-2	-2		1	0	1	-3	-1	-1		0	-5	0	-1	1	1
Z-9	W-3		64	66	66	66	6	8	5	7	47	47	47	47	33	31	29	33	52	48	53	53	41	43	38	36			-2	1	0	4	-1	3		0	1	0	-2	-5	7		-2	-2	0	2	4	-2
Z-9	W-4		53	51	55	55	23	25	18	23	68	69	66	66	8	6	5	6	68	64	63	64	7	12	11	11			-2	5	2	4	5	-4		-4	2	3	0	0	1		2	-2	-1	2	4	-5
Z-9	W-5		76	84	71	75	15	19	13	17	58	62	59	63	21	21	23	30	57	56	60	59	21	23	8	9			5	2	-1	4	-3	13		9	2	-1	-9	-3	14		-8	-4	-4	0	1	-2
Z-9	W-6		58	56	59	58	30	31	31	31	56	59	66	64	12	15	14	11	53	53	58	54	6	8	7	12			-1	-1	-10	4	-5	-1		-2	0	-5	4	-1	-4		2	-1	-3	-3	0	-2
Z-9	W-7		63	59	64	60	17	17	19	18	58	55	57	59	18	27	20	22	69	66	67	67	16	17	12	15			-1	-2	1	4	2	4		-1	-1	-4	5	-1	2		4	0	3	-9	3	-1
Z-9	W-8		71	76	64	64	21	21	22	23	62	66	59	61	28	26	30	31	64	57	58	62	46	41	36	39			7	-1	3	4	6	10		12	-2	5	-5	-5	2		-5	0	-4	2	7	5
Z-9	W-9		76	75	69	69	5	10	11	12	57	59	52	58	24	26	23	27	63	63	61	61	31	37	32	28			7	-6	5	4	2	-1		6	-2	1	-1	2	9		1	-5	-2	-2	0	-6
Z-9	W-10		56	55	56	54	22	25	27	27	60	60	61	63	11	11	12	17	69	73	68	63	23	31	30	33			0	-5	-1	4	1	-7		1	-2	-3	-6	10	-2		1	-3	0	0	-4	-8
Z-9	W-11		57	55	54	58	24	28	22	25	64	68	67	67	5	8	8	8	63	64	55	60	21	25	22	27			3	2	-3	4	8	-1		-3	3	1	0	4	-2		2	-4	-4	-3	-1	-4
Z-9	W-12		75	76	77	75	16	18	16	18	49	50	53	59	22	27	26	30	75	72	74	74	15	20	30	31			-2	0	-4	4	1	-15		1	0	-9	-3	-2	-11		-1	-2	-1	-5	3	-5
Z-10	W-1		49	50	47	46	4	3	4	2	73	73	68	71	25	31	32	32	52	60	56	58	14	19	18	17			2	0	5	4	-4	-4		4	1	2	-1	2	2		-1	1	0	-6	-8	-5
Z-10	W-2		44	44	47	44	10	9	7	5	67	71	69	71	29	33	29	31	58	61	57	56	16	22	26	19			-3	3	-2	4	1	-10		0	4	0	2	5	3		0	1	-4	-4	-3	-6
Z-10	W-3		61	65	59	63	7	9	9	9	55	56	42	44	29	32	26	27	48	54	47	51	34	33	38	46			2	-2	13	4	1	-4		2	0	12	5	3	-13		-4	-2	-1	-3	-6	1
Z-10	W-4		55	50	42	48	20	25	23	27	67	66	62	66	5	3	5	4	62	73	67	71	14	14	12	12			13	-3	5	4	-5	2		2	-2	0	-1	2	2		5	-5	1	2	-11	0
Z-10	W-5		66	69	73	74	10	9	8	11	52	56	53	56	15	14	16	17	46	46	56	54	8	9	12	14			-7	2	-1	4	-10	-4		-5	-2	0	-3	-8	-5		-3	1	-4	1	0	-1
Z-10	W-6		56	60	56	59	27	34	24	31	60	68	64	64	10	15	8	14	54	54	54	50	8	13	11	11			0	3	-4	4	0	-3		1	3	4	1	4	2		-4	-7	-8	-5	0	-5
Z-10	W-7		53	56	54	61	14	19	15	16	52	59	53	60	15	16	18	19	64	64	70	69	6	9	7	9			-1	-1	-1	4	-6	-1		-5	3	-1	-3	-5	0		-3	-5	-7	-1	0	-3
Z-10	W-8		59	61	61	63	21	30	12	15	59	60	62	61	21	25	18	22	60	56	53	44	36	42	38	39			-2	9	-3	4	7	-2		-2	15	-1	3	12	3		-2	-9	-1	-4	4	-6
Z-10	W-9		60	65	67	70	12	10	6	11	48	49	47	47	20	29	22	26	63	66	65	65	21	33	23	31			-7	6	1	4	-2	-2		-5	-1	2	3	1	2		-5	2	-1	-9	-3	-12
Z-10	W-10		50	49	45	46	28	33	25	25	61	64	49	56	9	11	7	10	70	74	75	78	24	25	19	26			5	3	12	4	-5	5		3	8	8	1	-4	-1		1	-5	-3	-2	-4	-1
Z-10	W-11		46	55	48	52	18	26	20	25	67	66	60	63	7	9	8	9	57	61	54	59	18	25	18	23			-2	-2	7	4	3	0		3	1	3	0	2	2		-9	-8	1	-2	-4	-7
Z-10	W-12		72	75	76	75	17	21	19	21	43	46	51	50	32	33	26	34	67	69	65	70	20	30	22	27			-4	-2	-8	4	2	-2		0	0	-4	-1	-1	3		-3	-4	-3	-1	-2	-10
[truncated: 54 more columns]

## Sheet:  Data I-B, II-B 
V.Macionis. Reliability of the standard goniometry and diagrammatic recording of finger joint angles: a comparative study with healthy subjects and non-professional raters. Additional file 7.
ID = identification; P= paper goniometer; G = standard goniometer; PIP = proximal interphalangeal joint; B-001-1, B-002-2, and so on = Try-angle Ids ( numbers indicate different angle magnitudes).
				Observed joint angle						Observed joint angle						Observed joint angle						Observed joint angle						Observed joint angle						Observed joint angle						Observed joint angle						Observed joint angle
				Raters W-11 and Z-11																									Raters W-12 and Z-12
Study stage	Joint	Rater ID	Subject ID	P B-001-1	G B-001-1	P B-002-2	G B-002-2	P B-003-3	G B-003-3	P B-004-4	G B-004-4	P B-005-5	G B-005-5	P B-006-6	G B-006-6	P B-007-7	G B-007-7	P B-008-8	G B-008-8	P B-009-9	G B-009-9	P B-0010-10	G B-0010-10	P B-0011-11	G B-0011-11	P B-0012-12	G B-0012-12		P B-001	G B-001	P B-002	G B-002	P B-003	G B-003	P B-004	G B-004	P B-005	G B-005	P B-006	G B-006	P B-007	G B-007	P B-008	G B-008	P B-009	G B-009	P B-0010	G B-0010	P B-0011
1 (E1)	PIP	W-11	Z-1	6	6	52	51	18	20	56	61	27	30	56	55	5	8	64	69	14	15	53	56	15	12	44	47
1 (E1)	PIP	W-11	Z-2	5	10	54	55	22	21	22	66	26	30	50	50	17	21	71	71	16	16	55	55	9	6	38	38
1 (E1)	PIP	W-11	Z-3	12	13	45	50	22	27	62	66	33	37	62	15	8	6	73	72	13	16	54	61	12	11	54	56
1 (E1)	PIP	W-11	Z-4	4	0	43	46	16	17	66	69	18	21	65	63	16	16	73	76	13	12	60	64	15	20	48	54
1 (E1)	PIP	W-11	Z-5	12	16	50	54	26	30	65	65	28	31	56	55	10	16	65	63	17	20	49	52	12	16	44	50
1 (E1)	PIP	W-11	Z-6	5	1	51	50	14	15	55	56	22	23	57	60	6	6	60	62	10	13	49	50	11	8	53	55
1 (E1)	PIP	W-11	Z-7	10	6	43	42	20	23	56	62	25	24	50	53	6	7	63	63	17	15	49	49	9	8	49	46
1 (E1)	PIP	W-11	Z-8	13	10	52	50	26	29	67	63	21	23	57	62	16	13	62	62	14	13	58	55	19	17	39	42
1 (E1)	PIP	W-11	Z-9	6	6	51	53	15	19	60	62	17	19	47	54	7	18	65	71	16	14	46	47	9	12	46	49
1 (E1)	PIP	W-11	Z-10	20	10	54	52	27	17	62	63	23	23	54	55	17	14	67	67	15	17	51	51	15	16	46	49
1 (E1)	PIP	W-11	Z-11	13	16	48	51	15	16	60	62	19	18	59	59	8	17	71	68	10	11	58	56	12	13	49	48
1 (E1)	PIP	W-11	Z-12	6	5	49	51	22	22	61	64	29	30	52	56	5	4	69	68	16	18	53	53	9	10	48	52
1 (E1)	PIP	W-12	Z-1																										8	13	49	53	19	26	61	63	9	3	50	45	6	10	40	46	17	17	64	65	20
1 (E1)	PIP	W-12	Z-2																										13	16	34	39	23	26	53	58	7	9	49	49	14	18	44	45	15	21	68	74	16
1 (E1)	PIP	W-12	Z-3																										10	10	54	56	23	26	59	63	7	7	49	56	5	8	47	49	11	18	69	65	16
1 (E1)	PIP	W-12	Z-4																										12	11	50	52	30	30	62	68	11	5	47	52	21	16	56	55	19	32	71	79	22
1 (E1)	PIP	W-12	Z-5																										19	21	43	47	27	31	58	61	4	0	45	43	8	5	45	46	17	21	65	68	23
1 (E1)	PIP	W-12	Z-6																										17	16	47	48	23	24	54	57	8	5	41	47	7	0	40	40	17	12	61	60	22
1 (E1)	PIP	W-12	Z-7																										13	11	47	48	29	24	54	56	11	4	47	41	10	6	42	46	12	13	67	69	19
1 (E1)	PIP	W-12	Z-8																										15	4	53	55	31	31	60	67	4	5	36	27	10	8	47	44	17	13	60	57	28
1 (E1)	PIP	W-12	Z-9																										4	4	47	47	21	24	55	54	9	2	41	43	7	8	48	48	13	16	65	70	16
1 (E1)	PIP	W-12	Z-10																										22	14	44	48	25	30	56	58	17	10	44	44	26	12	54	50	19	15	60	67	24
1 (E1)	PIP	W-12	Z-11																										18	11	51	49	18	22	51	54	7	11	39	41	21	18	52	54	13	16	55	54	18
1 (E1)	PIP	W-12	Z-12																										13	4	47	46	27	21	56	58	1	5	45	44	6	5	46	44	12	15	67	66	19
2 (E2)	PIP	Z-11	W-1	16	5	53	40	29	25	63	58	29	33	53	58	20	15	64	65	21	24	48	50	19	19	53	55
2 (E2)	PIP	Z-11	W-2	9	2	48	46	19	17	61	59	27	25	53	54	12	13	62	62	18	14	54	55	17	12	54	47
2 (E2)	PIP	Z-11	W-3	8	2	47	47	27	25	59	57	28	30	57	53	13	15	71	69	12	10	49	47	12	10	46	51
2 (E2)	PIP	Z-11	W-4	13	8	50	45	19	17	61	59	25	25	49	52	15	8	60	60	14	14	49	47	17	15	45	47
2 (E2)	PIP	Z-11	W-5	9	9	38	36	18	12	66	61	25	25	54	60	10	6	66	65	17	14	50	51	13	5	47	50
2 (E2)	PIP	Z-11	W-6	14	7	42	35	23	22	59	60	22	25	54	53	20	8	68	57	18	15	55	50	13	11	38	40
2 (E2)	PIP	Z-11	W-7	16	10	56	55	19	21	61	63	28	23	57	54	16	13	68	64	20	14	56	51	16	12	48	46
2 (E2)	PIP	Z-11	W-8	12	4	54	48	25	19	69	55	24	21	58	56	22	15	73	66	21	13	54	54	22	19	45	46
2 (E2)	PIP	Z-11	W-9	15	10	46	43	18	17	54	55	28	18	50	48	7	6	61	67	16	15	56	50	11	5	44	53
2 (E2)	PIP	Z-11	W-10	10	8	42	40	22	18	53	53	27	25	50	54	14	9	64	66	15	11	50	48	14	10	46	43
2 (E2)	PIP	Z-11	W-11	11	5	51	39	23	19	58	58	29	39	54	51	13	10	60	66	14	14	56	55	14	17	49	50
2 (E2)	PIP	Z-11	W-12	12	12	46	43	24	28	65	61	26	32	57	59	15	15	75	70	20	19	54	51	11	12	53	53
2 (E2)	PIP	Z-12	W-1																										11	12	45	55	28	31	59	61	14	16	42	50	15	17	44	46	16	18	67	72	24
2 (E2)	PIP	Z-12	W-2																										13	14	49	50	24	28	60	62	4	7	43	44	7	10	38	40	10	12	61	63	20
2 (E2)	PIP	Z-12	W-3																										5	8	52	54	28	27	55	55	10	10	47	47	8	9	46	49	15	15	64	66	21
2 (E2)	PIP	Z-12	W-4																										7	14	46	47	20	24	58	54	7	10	46	45	6	12	48	46	17	16	62	61	18
2 (E2)	PIP	Z-12	W-5																										13	13	49	51	20	22	63	60	2	6	47	47	19	16	43	39	21	30	68	68	27
2 (E2)	PIP	Z-12	W-6																										4	8	40	52	22	25	56	55	7	9	46	47	10	11	42	47	14	17	66	66	17
2 (E2)	PIP	Z-12	W-7																										14	13	48	51	21	23	57	59	7	17	44	43	9	11	43	45	11	14	63	71	24
2 (E2)	PIP	Z-12	W-8																										14	20	53	57	34	33	61	63	7	14	47	53	19	18	55	54	28	31	68	68	23
2 (E2)	PIP	Z-12	W-9																										9	5	51	49	32	32	58	59	6	10	44	46	7	11	48	51	18	16	62	60	22
2 (E2)	PIP	Z-12	W-10																										15	13	38	46	26	27	58	55	15	12	40	41	13	12	42	41	17	20	63	63	25
2 (E2)	PIP	Z-12	W-11																										11	10	45	50	25	29	62	63	14	12	47	53	12	12	50	52	23	23	67	70	21
2 (E2)	PIP	Z-12	W-12																										14	16	47	49	23	29	59	62	11	8	46	46	11	15	46	45	15	17	77	77	18
[truncated: 3 more columns]
